# Supplementary material for: A novel molecularly imprinted electrochemiluminescence sensor based on cobalt nitride nanoarray electrode for the sensitive detection of bisphenol S
Source: Royal Society of Chemistry journal article supplement (doi:10.1039/d0ra10676c), 2021-01-01
Supplement: d0ra10676c1.pdf [file d0ra10676c1.pdf]

Supplementary material

**A novel molecularly imprinted electrochemiluminescence sensor  
based on cobalt nitride nanoarray electrode for sensitive detection  
of bisphenol S**

Rongqi Cheng,<sup>a</sup> Yulong Ding,<sup>b</sup> Yaoguang Wang,<sup>c</sup> Huan Wang,<sup>a</sup> Yong Zhang<sup>a\*</sup> and Qin Wei<sup>a</sup>

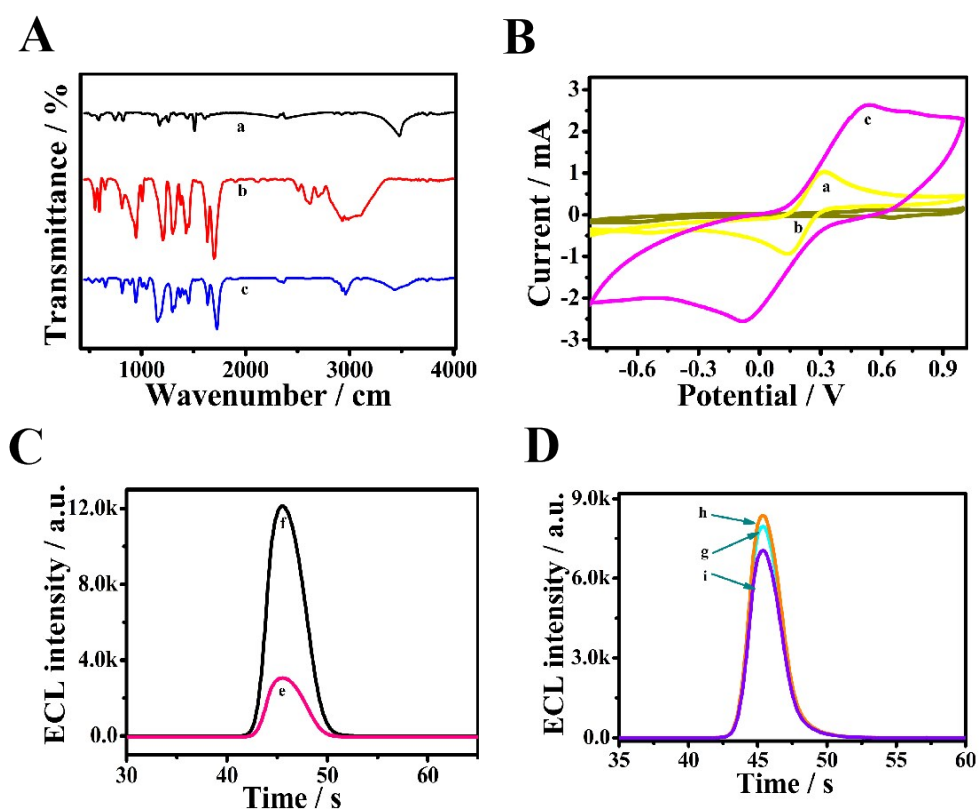

**Fig.S1.** (A) FT-IR spectra of (a) BPS, (b) MAA, (c) BPS-MIP; (B) Cyclic voltammograms of various electrodes in a 5 mmol/L  $K_3[Fe(CN)_6]$  and 0.1 mol/L  $KNO_3$  solution: (a) bare CC electrode, (b)  $Ru(bpy)_3^{2+}/Nafion/CC$ , (c)  $Ru(bpy)_3^{2+}/Nafion/CoN/CC$ , Scan rate: 0.1 V/s; (C) ECL responses of each electrode modification step in 10 mL of PBS (pH 7.4) containing 55 mmol/L of TPrA: (e)  $Ru(bpy)_3^{2+}/Nafion/CC$ , (f)  $Ru(bpy)_3^{2+}/Nafion/CoN/CC$ ; (D) ECL responses of each electrode modification step in 10 mL of PBS (pH7.4) containing 55 mmol/L of TPrA: (g) NIP/ $Ru(bpy)_3^{2+}/Nafion/CoN/CC$ , (h) Eluted NIP/ $Ru(bpy)_3^{2+}/Nafion/CoN/CC$ , (i) Rebinding MIP/ $Ru(bpy)_3^{2+}/Nafion/CoN/CC$ .

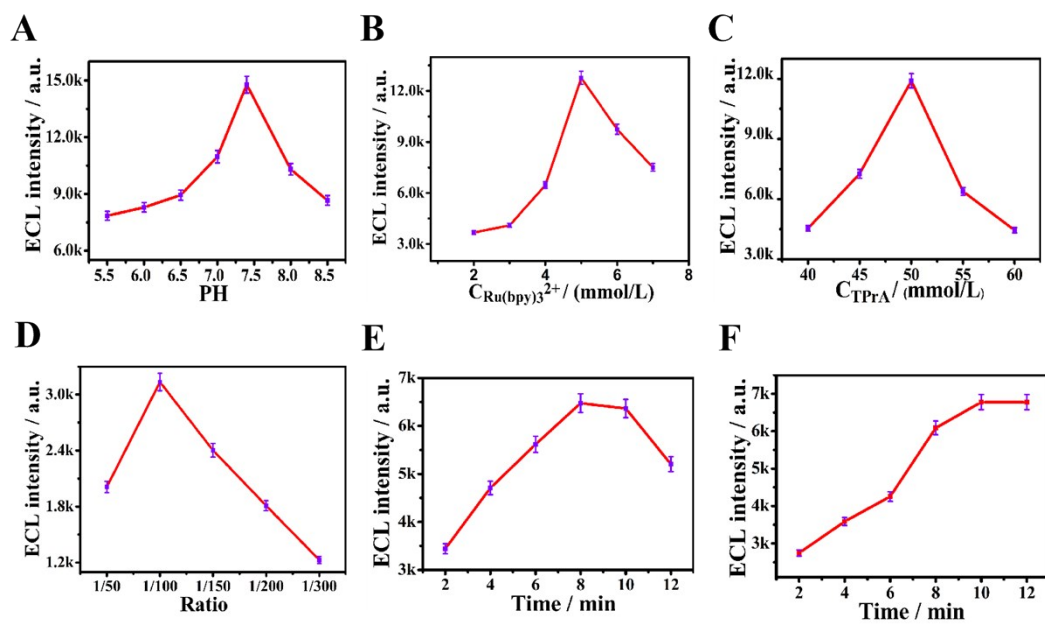

**Fig.S2.** (A) Effect of pH on ECL intensity, (B) Concentration of  $Ru(bpy)_3^{2+}$  on ECL intensity, (C) Concentration of TPrA on ECL intensity, (D) Effect of ratio of template molecules to functional monomers on ECL intensity, (E) Effect of incubation time of template molecule on ECL intensity, (F) Effect of elution time on ECL intensity.

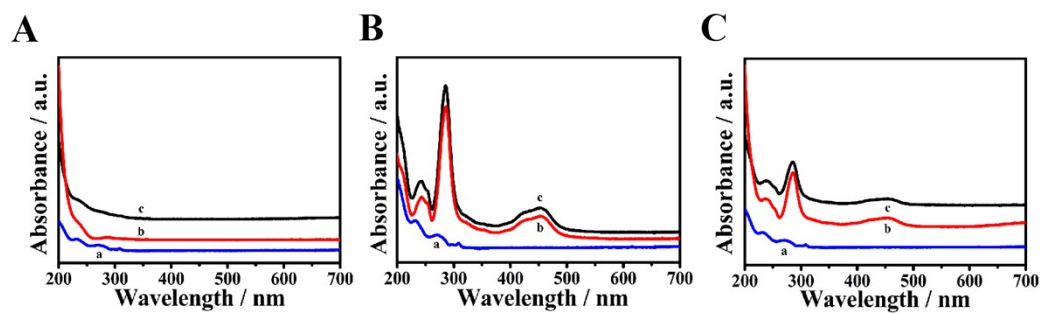

**Fig.S3.** (A) UV-Vis spectra of (a) BPS, (b)  $Ru(bpy)_3^{2+}$ +TPrA, (c)  $Ru(bpy)_3^{2+}$ +TPrA+BPS; (B) UV-Vis spectra of (a) BPS, (b)  $Ru(bpy)_3^{2+}$ , (c)  $Ru(bpy)_3^{2+}$ +BPS; (C) UV-Vis spectra of (a) BPS, (b) TPrA, (c) TPrA+BPS.

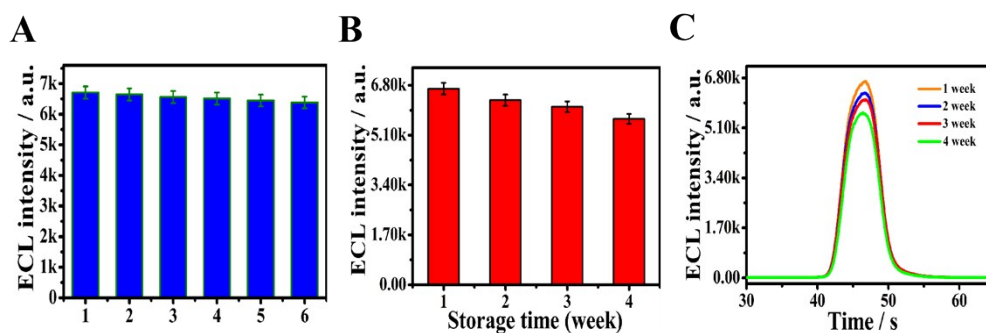

**Fig.S4.** (A) Repeatability of MIECL sensor incubated with  $1.0 \times 10^{-6}$  mol/L BPS, (B) Long-term storage stability of the MIECL sensor incubated with  $1.0 \times 10^{-6}$  mol/L bisphenol S, (C) ECL-Time curves of long-term storage stability of the MIECL sensor.

Table S1 Comparison of various methods for determination of BPS

| Methods                                 | Linear range (mol/L)                         | LOD (mol/L)           | Reference |
|-----------------------------------------|----------------------------------------------|-----------------------|-----------|
| fluorescence aptasensor                 | $5.0 \times 10^{-8}$ - $2.0 \times 10^{-6}$  | $2.0 \times 10^{-9}$  | 1         |
| MIP-potentiometric sensor               | $1.0 \times 10^{-7}$ - $2.0 \times 10^{-6}$  | $4.0 \times 10^{-8}$  | 2         |
| Electrochemical sensor                  | $1.0 \times 10^{-6}$ - $1.0 \times 10^{-4}$  | $5.0 \times 10^{-7}$  | 3         |
| DLLME-UHPLC-MS/MS                       | $1.21 \times 10^{-9}$ - $1.6 \times 10^{-7}$ | $4.0 \times 10^{-10}$ | 4         |
| MIP-Electrochemical sensor              | $1.0 \times 10^{-8}$ - $5.0 \times 10^{-5}$  | $1.1 \times 10^{-8}$  | 5         |
| Electrochemical sensor                  | $5.0 \times 10^{-7}$ - $5.0 \times 10^{-5}$  | $9.0 \times 10^{-8}$  | 6         |
| Ratio derivate ultraviolet spectrometry | $1.4 \times 10^{-6}$ - $1.0 \times 10^{-4}$  | $4.4 \times 10^{-7}$  | 7         |
| Py-GC/MS                                | -                                            | $4.0 \times 10^{-6}$  | 8         |
| MIP-Electrochemical sensor              | $1.0 \times 10^{-7}$ - $5.0 \times 10^{-5}$  | $3.0 \times 10^{-8}$  | 9         |
| MIP-Electrochemiluminescence sensor     | $2.4 \times 10^{-9}$ - $5.0 \times 10^{-5}$  | $7.5 \times 10^{-10}$ | this work |

DLLME-UHPLC-MS/MS: dispersive liquid-liquid microextraction ultrahigh-performance liquid chromatography-tandem mass spectrometry.

Py-GC/MS: pyrolysis gas chromatography mass spectrometry.

Table S2 Comparison of this method with other reported ECL methods for detecting BPA

| Methods                             | Linear range (mol/L)                         | LOD (mol/L)           | Reference |
|-------------------------------------|----------------------------------------------|-----------------------|-----------|
| Electrochemiluminescence sensor     | $4.4 \times 10^{-8}$ - $2.2 \times 10^{-5}$  | $2.9 \times 10^{-6}$  | 10        |
| MIP-Electrochemiluminescence sensor | $2.2 \times 10^{-10}$ - $1.1 \times 10^{-7}$ | $4.5 \times 10^{-11}$ | 11        |
| Electrochemiluminescence sensor     | $2.6 \times 10^{-7}$ - $9.9 \times 10^{-3}$  | $8.3 \times 10^{-8}$  | 12        |
| Electrochemiluminescence sensor     | $3.0 \times 10^{-8}$ - $1.0 \times 10^{-6}$  | $1.0 \times 10^{-8}$  | 13        |
| Electrochemiluminescence sensor     | $5.0 \times 10^{-8}$ - $3.0 \times 10^{-6}$  | $2.0 \times 10^{-8}$  | 14        |
| MIP-Electrochemiluminescence sensor | $2.4 \times 10^{-9}$ - $5.0 \times 10^{-5}$  | $7.5 \times 10^{-10}$ | This work |

Table S3 Determination result and recovery of bisphenol S in the drinking water sample(n=5)

| Sample number | Detected ( $10^{-6}$ mol/L) | Added ( $10^{-6}$ mol/L) | Total found by MIECL sensor ( $10^{-6}$ mol/L) | RSD (%) | Recovery <sup>a</sup> (%) | Total found by HPLC method( $10^{-6}$ mol/L) | RSD (%) | Recovery <sup>a</sup> (%) |
|---------------|-----------------------------|--------------------------|------------------------------------------------|---------|---------------------------|----------------------------------------------|---------|---------------------------|
| 1             |                             | 5.00                     | 10.17                                          | 2.9     | 98.0                      | 10.25                                        | 2.9     | 99.6                      |
| 2             | 5.27                        | 10.0                     | 15.19                                          | 3.3     | 99.2                      | 15.50                                        | 3.3     | 102.3                     |
| 3             |                             | 15.0                     | 20.96                                          | 2.6     | 104.6                     | 20.79                                        | 2.6     | 103.4                     |

<sup>a</sup> The recovery is calculated through the equation1.

$$(1) \quad \text{Recovery}(\%) = \frac{\text{Found} - \text{detected}}{\text{Added}} \times 100\%$$

Table S4 *t*-Test about the drinking water analysis(n=5)

| Sample             | HPLC ( $10^{-6}$ mol/L)  | Mean ( $10^{-6}$ mol/L) | RSD (%) | This method ( $10^{-6}$ mol/L) | Mean ( $10^{-6}$ mol/L) | RSD (%) | <i>t</i> -Test <sup>b</sup> | P    |
|--------------------|--------------------------|-------------------------|---------|--------------------------------|-------------------------|---------|-----------------------------|------|
| The drinking water | 4.79,5.20,4.61,6.00,5.80 | 5.30                    | 5.7     | 4.53,5.16,5.84,4.88,5.95       | 5.27                    | 6.3     | 1.912                       | 0.95 |

<sup>b</sup> The *t* value is calculated through the equation2.

$$(2) \quad t = \frac{|\bar{x} - \mu|}{s} \sqrt{n}$$

## References

- 1 K. Chen, W. Zhang, Y. Zhang, L. Huang, R. Wang and J. Wang, *Sens. Actuators, B*, 2018, **259**, 717-724.
- 2 T. Wang, R. Liang, T. Yin, R. Yao and Q. Wei, *RSC Adv.*, 2016, **6**, 73308-73312.
- 3 W. Zhu, X. Yue, J. Duan, Y. Zhang, W. Zhang, S. Yu, Y. Wang, D. Zhang and J. Wang, *Electrochim. Acta*, 2016, **188**, 85-90.
- 4 F. Vela-Soria, O. Ballesteros and A. Zafra-Gómez, *Anal. Bio. Chem.*, 2014, **406**, 3773-3785.

- 
- 5 J. Yao, M. Chen, N. Li, C. Liu and M. Yang, *Anal. Chim. Acta*, 2019, **1066**, 36-48.
- 6 Y. Pang, Y. Huang and L. Wang, *Environ. Pollut*, 2020, 114616.
- 7 G. Cao, T. Chen and Y. Zhuang, *J. Fluoresc*, 2013, **23**, 641-647.
- 8 V. Becerra and J. Odermatt, *Analyst.*, 2012, **137**, 2250-2259.
- 9 H. Rao, X. Zhao, X. Liu, J. Zhong, Z. Zhang and P. Zou, *Biosens. Bioelectron.*, 2018, **100**, 341-347.
- 10 J. Y. Chai, X. R. Yu, J. Zhao, A. Sun, X. Shi, D. Li, *Sensors*, 2018, **18**, 25-37.
- 11 X. Jiang, W. Ding and C. Luan, *Can. J. Chem*, 2013, **91**, 656-661.
- 12 W. Guo, A. Zhang, X. Zhang, C. Huang, D. Yang and N. Jia, *Anal. Bio. Chem*, 2016, **408**, 7173-7180.
- 13 L. B. Li, B. Yu, X. P. Zhang and T. Y. You, *Anal. Chim. Acta*, 2015, **895**, 104-111.
- 14 Y. Y. Wu, Z. Y. Zheng, J. Y. Yang, Y. J. L, X. S. Z, Y. W. C and W. H. G, *J. Electroanal. Chem*, 2018, **817**, 118-127.
